# Supplementary material
Source: PubMed Central journal article supplement (PMC10840808)
Supplement: NIHMS1932588-supplement-2.pdf [file NIHMS1932588-supplement-2.pdf]

| Gene Name | Direction | Sequence (5'-3')               |
|-----------|-----------|--------------------------------|
| FABP5     | Forward   | TGA AGG AGC TAG GAG TGG GAA    |
|           | Reverse   | TGC ACC ATC TGT AAA GTT GCA G  |
| KRT18     | Forward   | GGC ATC CAG AAC GAG AAG GAG    |
|           | Reverse   | ATT GTC CAC AGT ATT TGC GAA GA |
| KRT19     | Forward   | AAC GGC GAG CTA CAG GTG A      |
|           | Reverse   | GGA TGG TCG TGT AGT AGT GGC    |
| NRP2      | Forward   | GCT GGC TAT ATC ACC TCT CCC    |
|           | Reverse   | TCT CGA TTT CAA AGT GAG GGT TG |
| PIN1      | Forward   | TGC CAC CGT CAC ACA GTA TT     |
|           | Reverse   | CTG ACC AGG CCT TCT CTT TG     |
| POSTN     | Forward   | CTC ATA GTC GTA TCA GGG GTC G  |
|           | Reverse   | ACA CAG TCG TTT TCT GTC CAC    |
| TAGLN     | Forward   | AGT GCA GTC CAA AAT CGA GAA G  |
|           | Reverse   | CTT GCT CAG AAT CAC GCC AT     |
| OCT4      | Forward   | TGA GTC AGT GAA CAG GGA ATG    |
|           | Reverse   | AAT CTC CCC TTT CCA TTC GG     |

**Supplemental Table S1.** qRT-PCR primers used in this study.
