# Supplementary material
Source: PubMed Central journal article supplement (PMC10840808)
Supplement: NIHMS1932588-supplement-3.pdf [file NIHMS1932588-supplement-3.pdf]

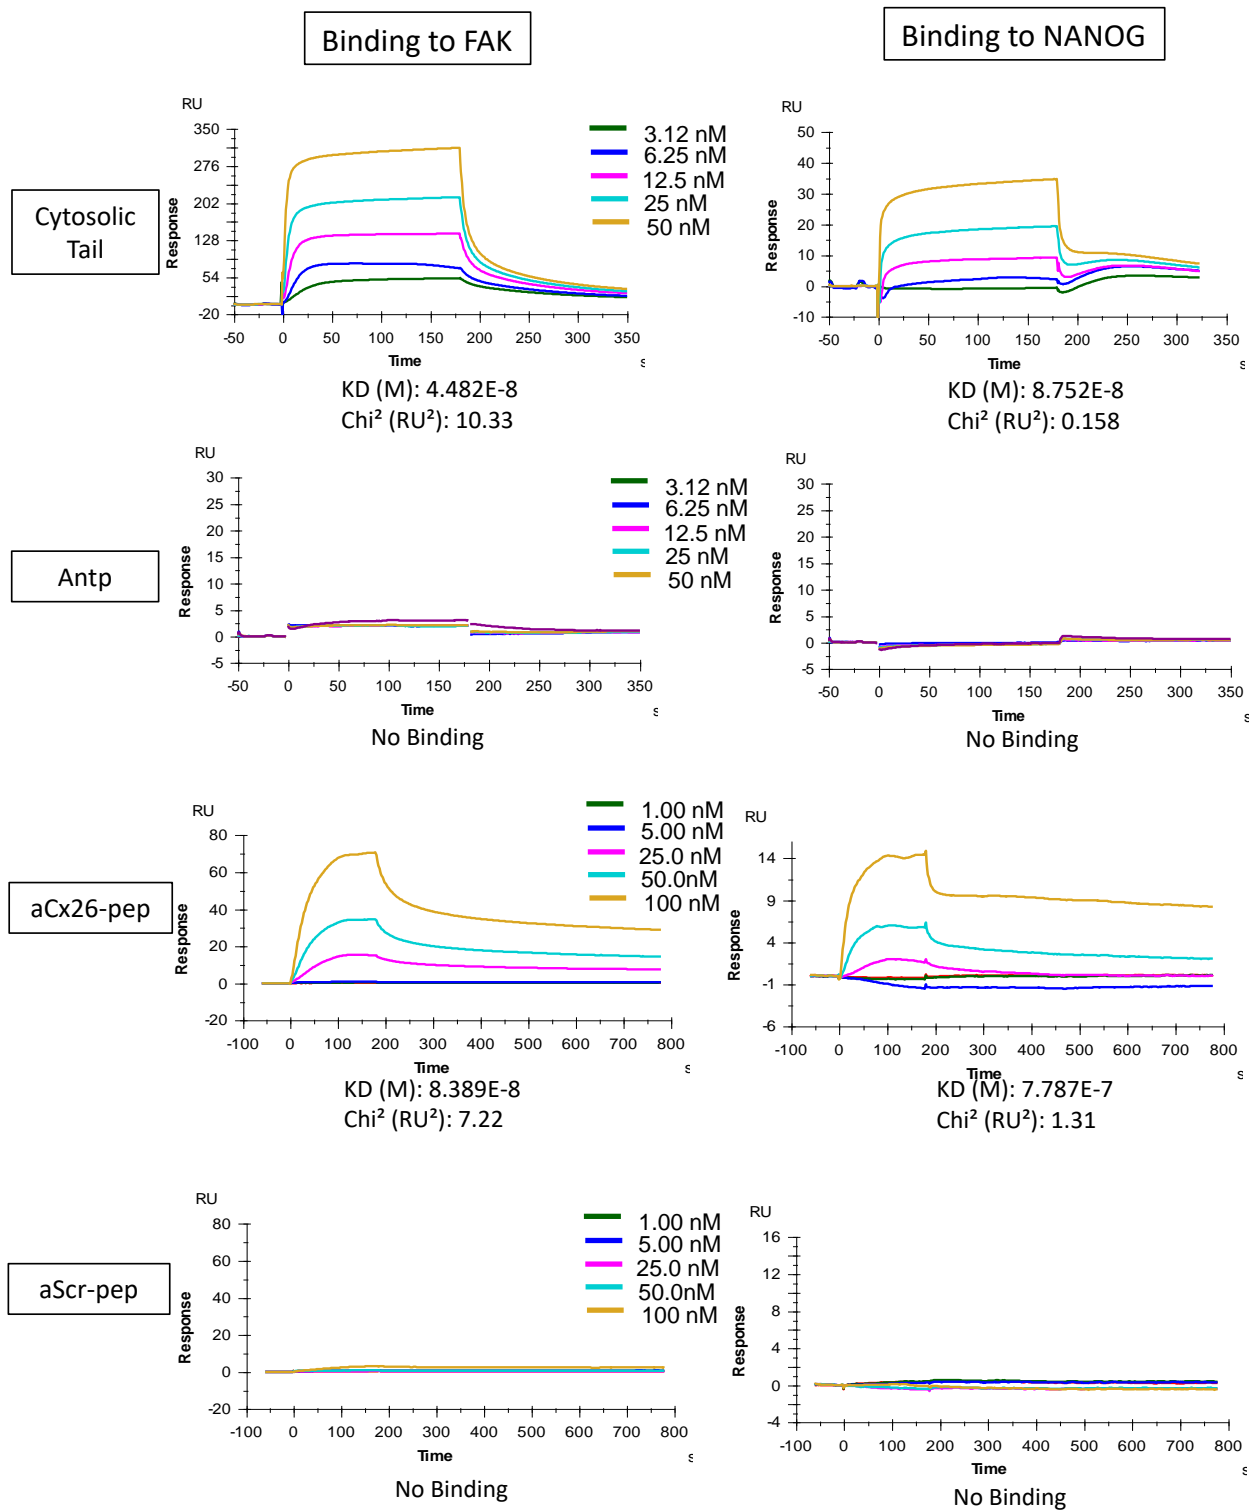

**Supplemental Figure S2.** SPR sensograms demonstrating binding of Cx26 peptides to FAK or NANOG proteins.
