# Supplementary material
Source: PubMed Central journal article supplement (PMC10840808)
Supplement: NIHMS1932588-supplement-4.pdf [file NIHMS1932588-supplement-4.pdf]

| Name     | Sequence                 | NANOG         | FAK           |
|----------|--------------------------|---------------|---------------|
| Wildtype | RYCSGKSKKPV              | $1.80^{-7}$ M | $1.49^{-5}$ M |
| xR216    | X <del>Y</del> CSGKSKKPV | $5.38^{-7}$ M | $2.0^{-5}$ M  |
| xRY      | <del>XX</del> CSGKSKKPV  | $8.76^{-6}$ M | $1.94^{-6}$ M |
| 221-226  | <del>XXXXXX</del> KSKKPV | > 1.00 M      | > 1.00 M      |
| 216-220  | RYCSG <del>XXXXXX</del>  | $6.40^{-9}$ M | $4.5^{-7}$ M  |
| xV226    | RYCSGKSKKP <del>X</del>  | $2.10^{-7}$ M | $2.03^{-5}$ M |

**Supplemental Table S2.** Dissociation constants derived from SPR showing that FAK and NANOG specifically bind to amino acids 216-220 of the Cx26 cytosolic tail.
