# Supplementary material
Source: PubMed Central journal article supplement (PMC10840808)
Supplement: NIHMS1932588-supplement-5.pdf [file NIHMS1932588-supplement-5.pdf]

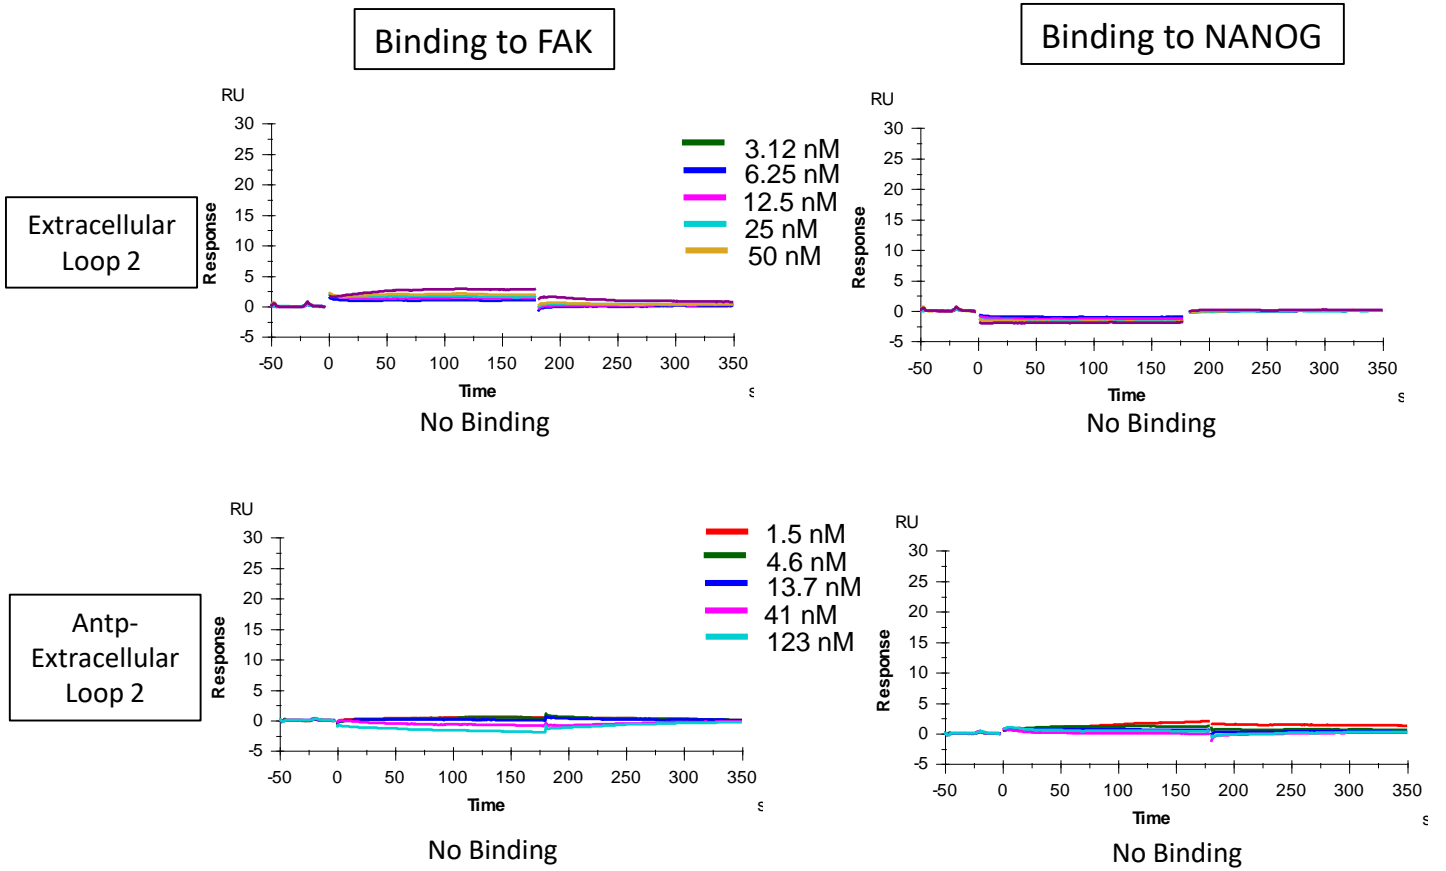

**Supplemental Figure S3.** SPR sensograms demonstrating no binding of Cx26 extracellular loop peptides to FAK or NANOG proteins.
