# Supplementary material
Source: PubMed Central journal article supplement (PMC10840808)
Supplement: NIHMS1932588-supplement-6.pdf [file NIHMS1932588-supplement-6.pdf]

| Cell Line  | Peptide Treatment | Confidence intervals for 1/(stem cell frequency) |          |       | p-value |
|------------|-------------------|--------------------------------------------------|----------|-------|---------|
|            |                   | Lower                                            | Estimate | Upper |         |
| MDA-MB-231 | Vehicle           | 4.39                                             | 2.3      | 1.4   | -       |
| MDA-MB-231 | Antp              | 7.27                                             | 3.7      | 2.37  | n.s.    |
| MDA-MB-231 | aScr-pep          | 8.43                                             | 4.73     | 2.78  | n.s.    |
| MDA-MB-231 | aCx26-pep         | 427.39                                           | 104.7    | 25.94 | 4.0e-12 |
| MDA-MB-468 | Vehicle           | 14.6                                             | 8.2      | 4.8   | -       |
| MDA-MB-468 | Antp              | 20.4                                             | 11.2     | 6.3   | n.s.    |
| MDA-MB-468 | aScr-pep          | 17                                               | 9.46     | 4.7   | n.s.    |
| MDA-MB-468 | aCx26-pep         | 1514.6                                           | 211.5    | 29.9  | 6.7e-5  |
| HCC70      | Vehicle           | 2.1                                              | 1.2      | 1.0   | -       |
| HCC70      | Antp              | 4.4                                              | 2.3      | 1.4   | n.s.    |
| HCC70      | aScr-pep          | 4.3                                              | 2.31     | 1.4   | n.s.    |
| HCC70      | aCx26-pep         | 118.1                                            | 45.1     | 17.5  | 6.2e-13 |
| MCF7       | Vehicle           | 3.9                                              | 2.0      | 1.3   | -       |
| MCF7       | Antp              | 2.1                                              | 1.2      | 1.0   | n.s.    |
| MCF7       | aScr-pep          | 6.12                                             | 3.35     | 1.97  | n.s.    |
| MCF7       | aCx26-pep         | 7.27                                             | 4.0      | 2.3   | n.s.    |

**Supplemental Table S3.** Estimates for tumorsphere formation efficiency and p-values from Fig. 3C-F.
