# Supplementary material
Source: PubMed Central journal article supplement (PMC10840808)
Supplement: NIHMS1932588-supplement-7.pdf [file NIHMS1932588-supplement-7.pdf]

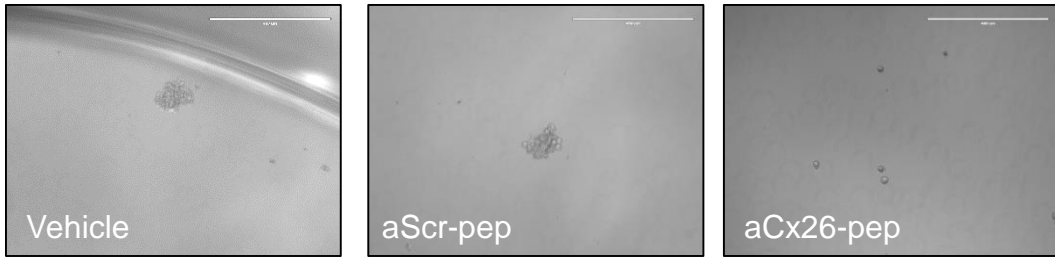

**Supplemental Figure S4.** Representative images from the tumorsphere formation assays shown in Fig. 3C (MDA-MB-231). Scale bar, 400  $\mu$ m.
