# Supplementary material
Source: PubMed Central journal article supplement (PMC10840808)
Supplement: NIHMS1932588-supplement-8.pdf [file NIHMS1932588-supplement-8.pdf]

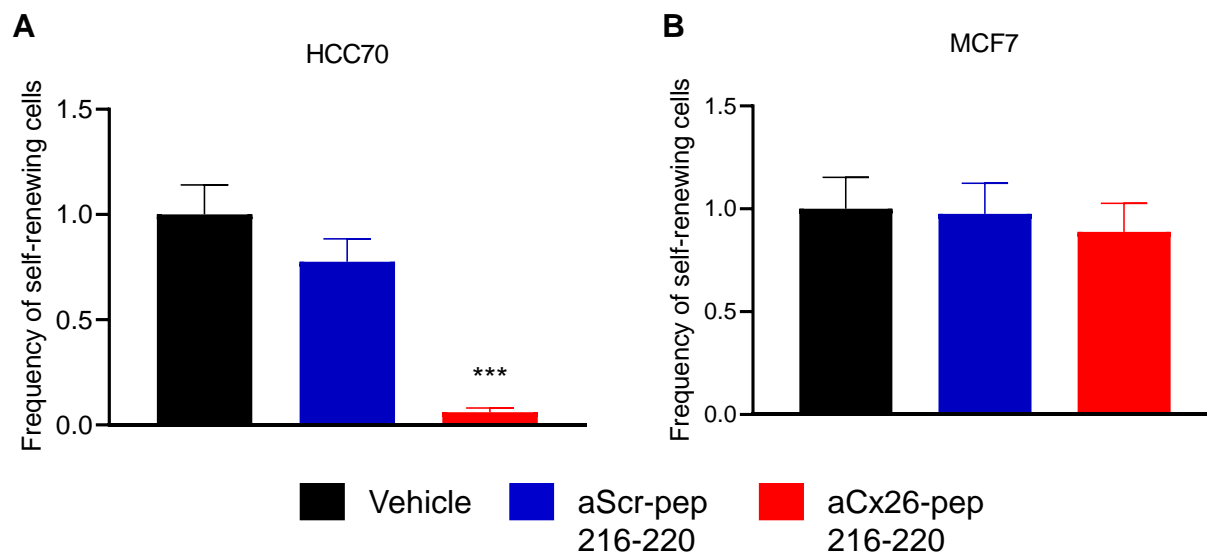

**Supplemental Figure S5.** The shortened aCx26-pep 216-220 attenuates tumorsphere-formation frequency similarly to the full-length aCx26-pep only in TNBC. \*\*\*  $p < 0.001$  by Chi-squared test compared to aScr-pep. Shown is one replicate representative of three independent experiments.
