# Supplementary material
Source: PubMed Central journal article supplement (PMC10840808)

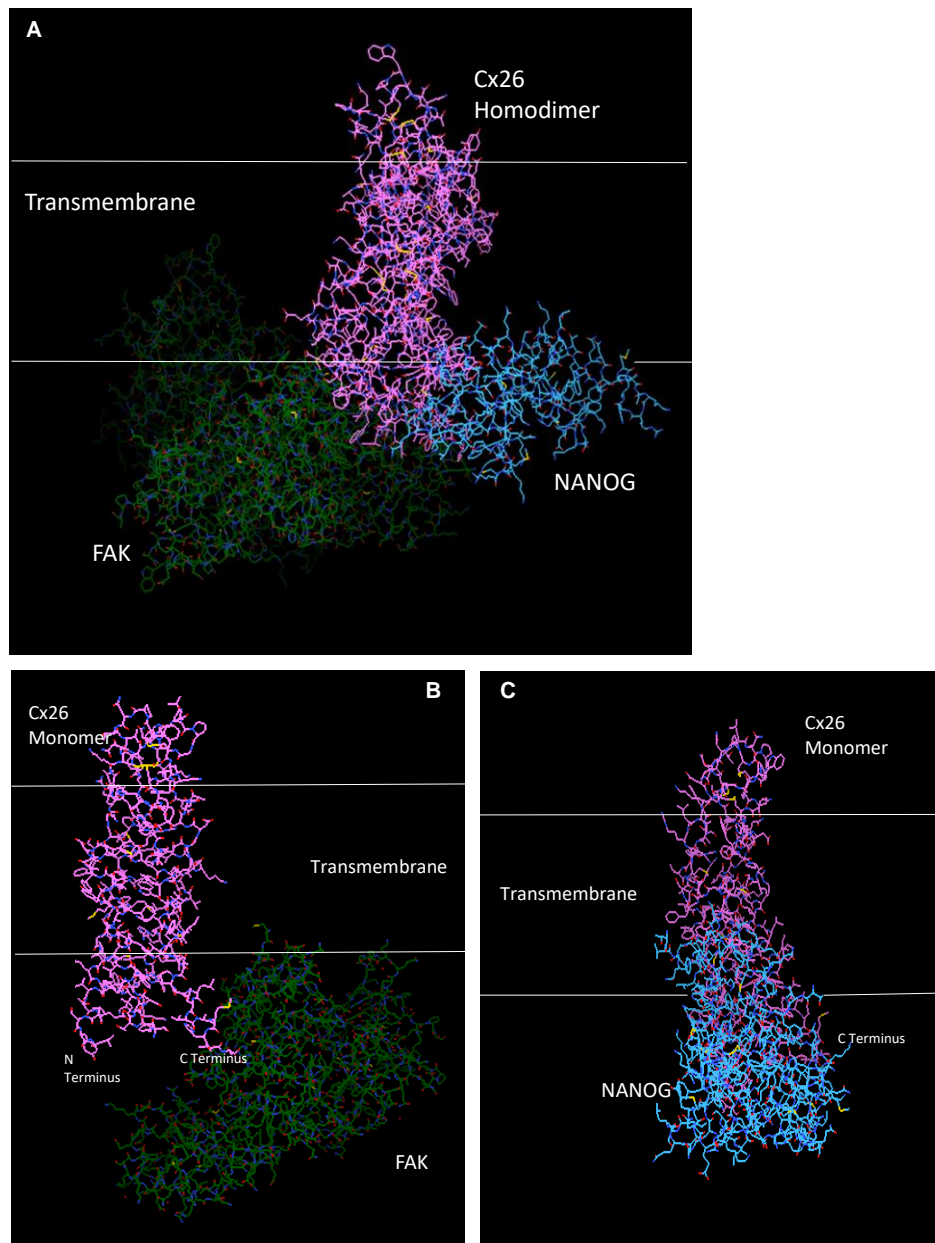

**Supplemental Figure S1.** Predicted model of Cx26 in complex with NANOG and FAK.

Supplement: NIHMS1932588-supplement-1.pdf [file NIHMS1932588-supplement-1.pdf]
